# Supplementary material
Source: PubMed Central journal article supplement (PMC3270981)

## Supplemental Information

### Supplemental Figure S1

(A) Wild-type (WT), *atg1Δ*, *atg32Δ*, and *atg11Δ* cells were pre-cultured in YPL to mid-log phase and then shifted to SD–N. After the indicated number of days, cells were inoculated onto YPD plates and the number of colonies formed was counted. The values represent the mean and standard deviation of three experiments. (B) Wild-type (WT), *atg32Δ*, and *atg11Δ* cells cultured in YPL for 5 days. Cells were inoculated onto YPD plates and the size of colonies formed was observed.

### Supplemental Figure S2

(A) Wild-type (WT), *atg1Δ*, *atg32Δ*, and *atg11Δ* cells on a BY4742 background were pre-cultured in YPL to mid-log phase and then shifted to SD–N. After the indicated number of days, cells were inoculated onto YPD plates and the number of colonies formed was counted. The values represent the mean and standard deviation of three experiments. (B) Wild-type (WT), *atg32Δ*, and *atg11Δ* cells on a BY4742 background were pre-cultured in YPL to mid-log phase and then shifted to SD–N for 4 days. Cells were inoculated onto YPD plates and the size of colonies formed was observed (typical small and large colonies

are indicated by arrowheads and arrows, respectively). (C) Wild-type (WT), *atg32Δ*, and *atg11Δ* cells on a BY4742 background were pre-cultured in YPL to mid-log phase and then shifted to SD–N. After the indicated number of days of nitrogen starvation, cells were inoculated onto YPD plates and the proportion of small colonies formed was calculated (more than 80 colonies were measured for each experiment). The values represent the mean and standard deviation of three experiments. \*\* $P < 0.005$ , \* $P < 0.01$  by paired *t*-test.

### Supplemental Figure S3

(A) The agarose gels used in Figure 2C were incubated with ethidium bromide and exposed to ultraviolet light to confirm consistency in the amount of DNA loaded. (B and C) Large (L) and small (S) colonies of wild-type (WT) cells formed after 20 days nitrogen starvation were cultured in YPD to mid-log phase. Cell lysates were immunoblotted with anti-Cox2, anti-Por1, and anti-Pgk1 (loading control) antibodies (B). Whole-cell DNA was digested by Bam HI and analyzed by Southern blotting with *COX1* and *COB* mtDNA probes (C).

### Supplemental Figure S4

(A) The mean fluorescence strength from Figure 3A is shown graphically. The values represent the mean and standard deviation of three experiments.  $*P < 0.01$  by paired *t*-test. (B) The data from Figure 3A are expressed by genotype rather than by days of nitrogen starvation. WT, wild type.

### **Supplemental Figure S5**

(A) Wild-type (WT), *atg32Δ*, and *atg11Δ* cells were pre-cultured in YPL to mid-log phase and then shifted to SD–N containing 1 mM of the ROS scavenger N-acetylcysteine (NAC) or dimethyl sulfoxide (control). After 6 days of nitrogen starvation, cells were inoculated onto YPD plates and the size of colonies formed was observed. (B and C) Large (L) and small (S) colonies of *atg32Δ* and *atg11Δ* cells were cultured in YPD to mid-log phase. Cell lysates were immunoblotted with anti-Cox2, anti-Por1, and anti-Pgk1 (loading control) antibodies (B). Whole-cell DNA was digested by Bam H1 and analyzed by Southern blotting with *COX1* and *COB* mtDNA probes (C).

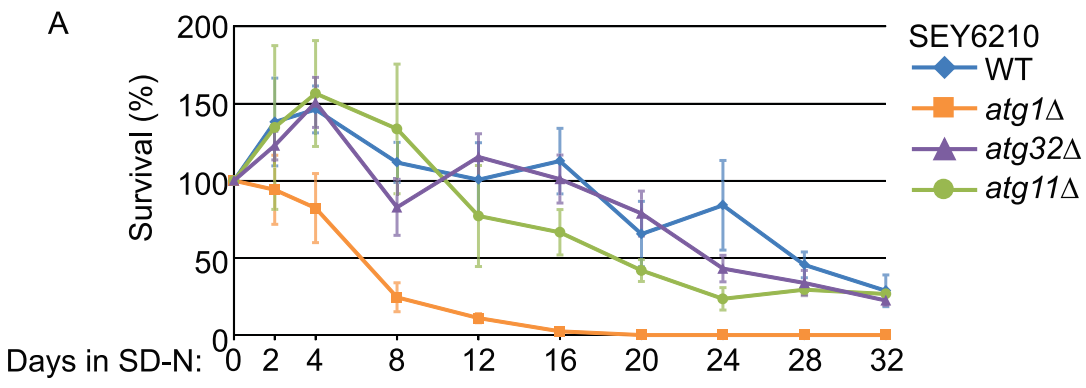

B

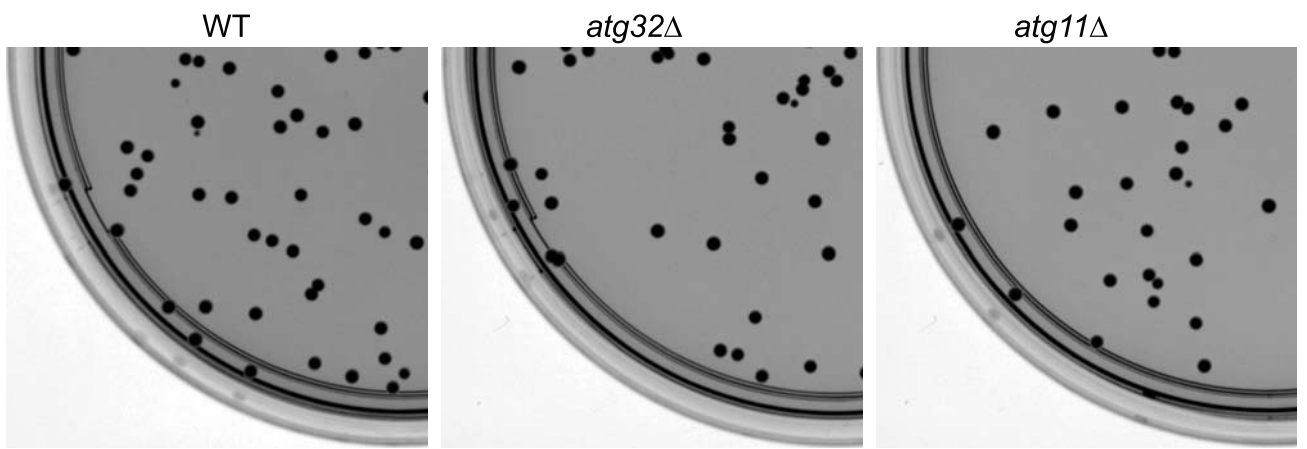

5 days in YPL

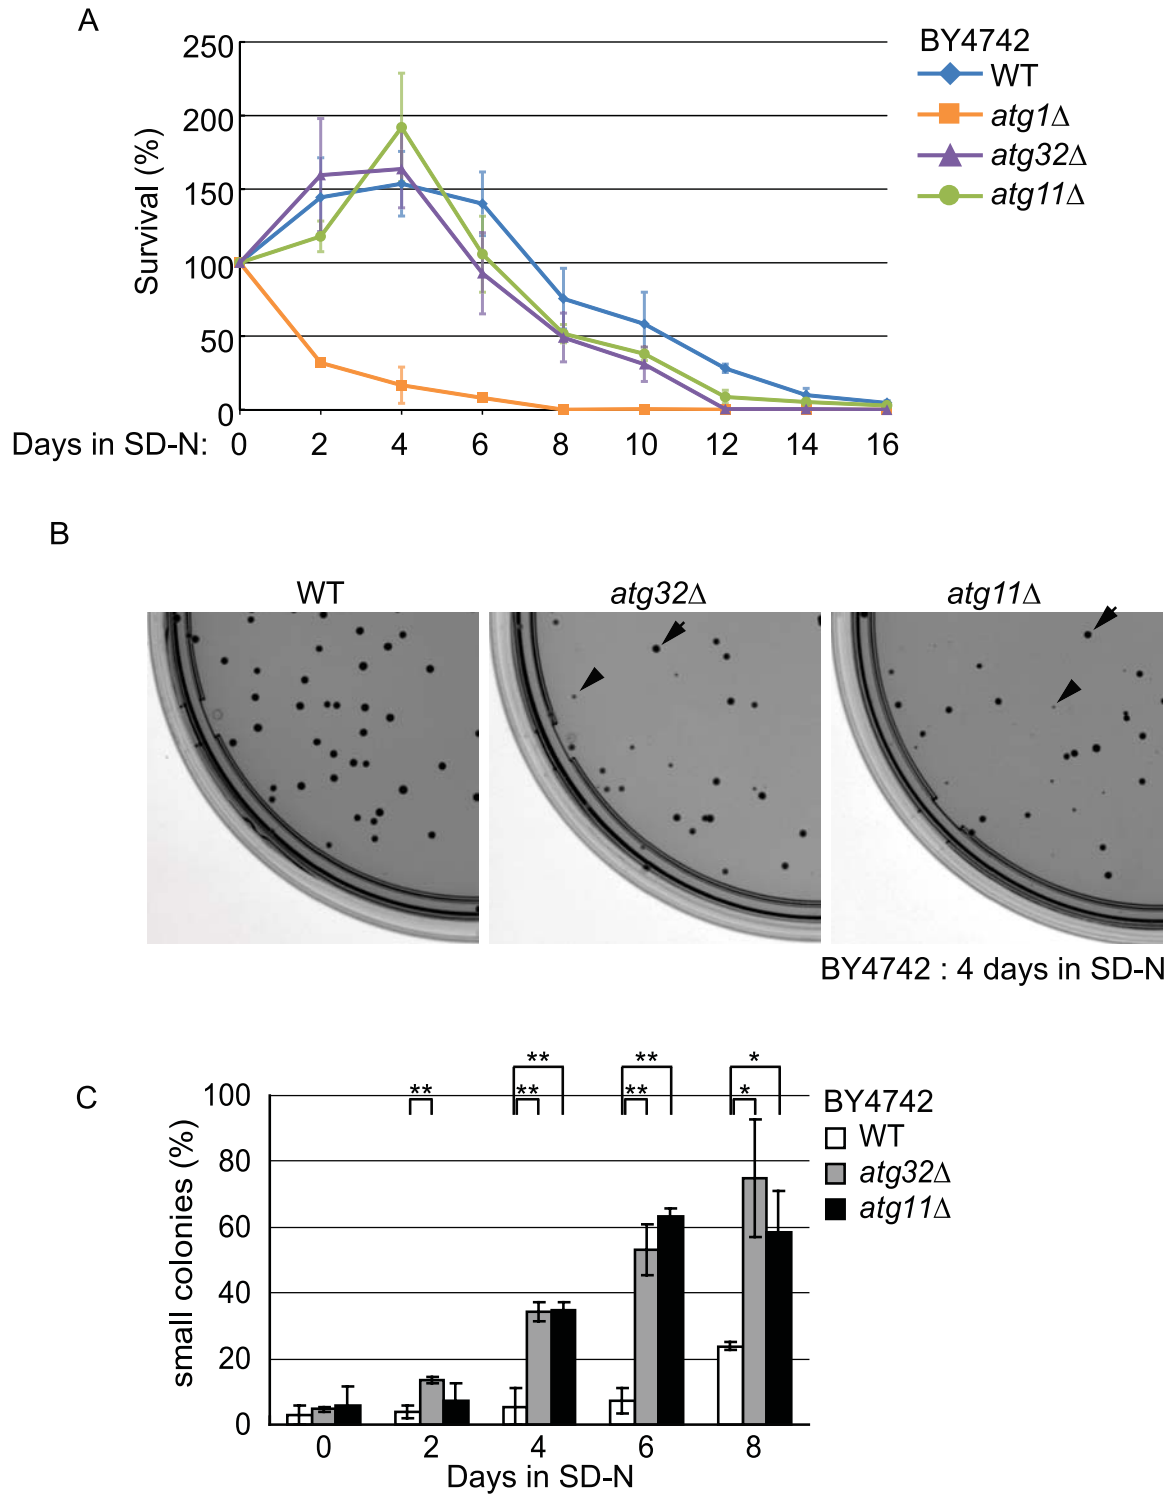

A

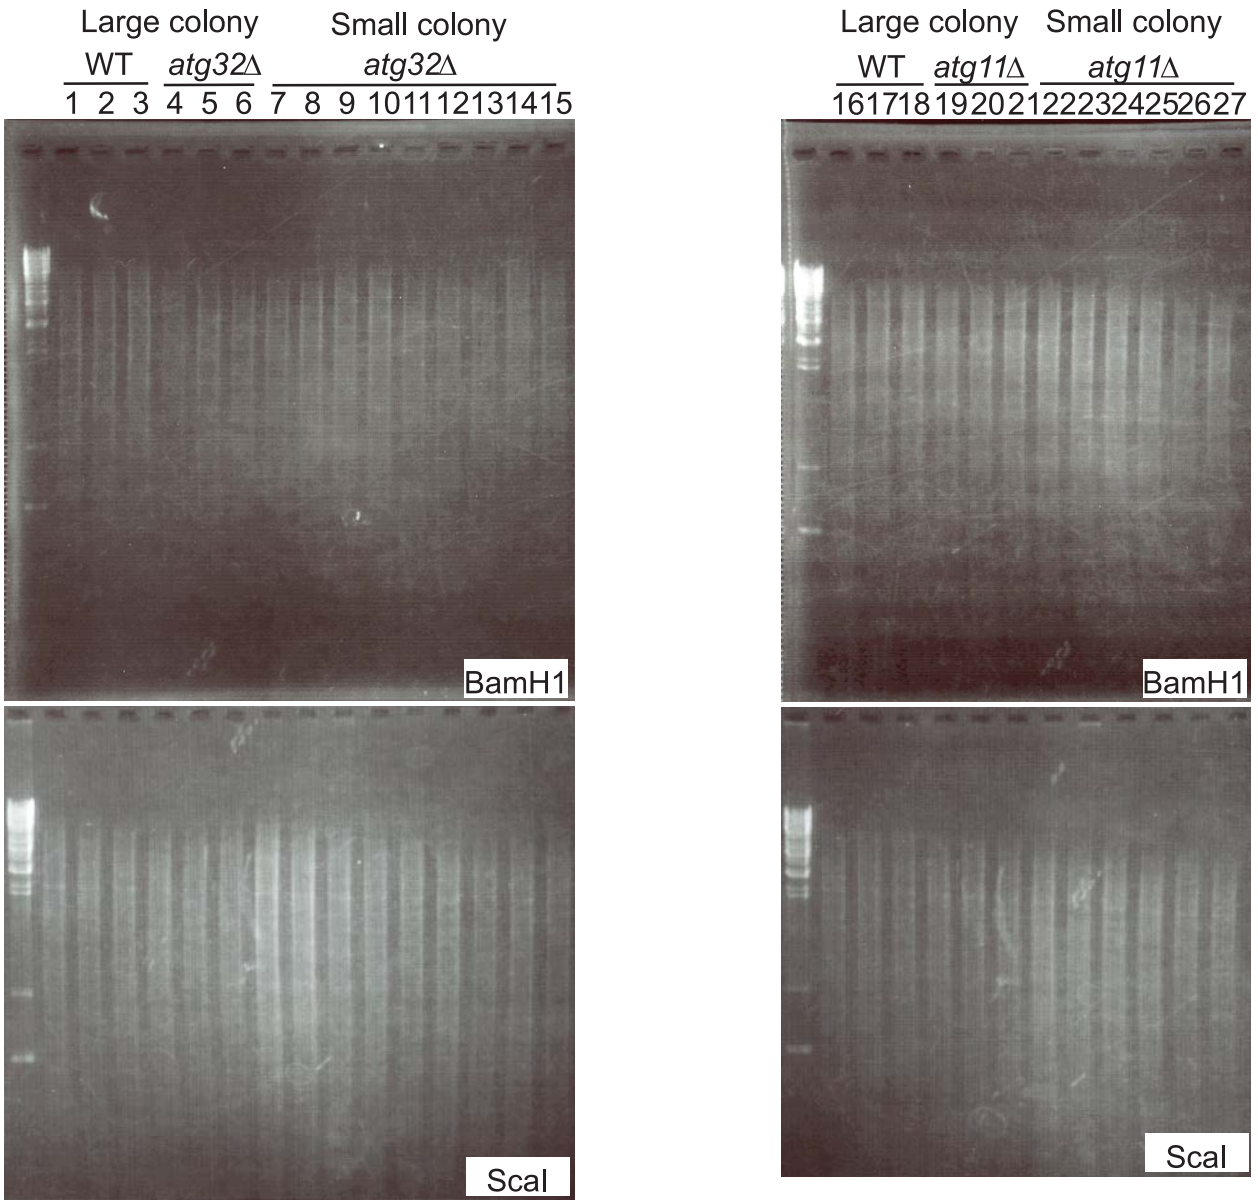

B

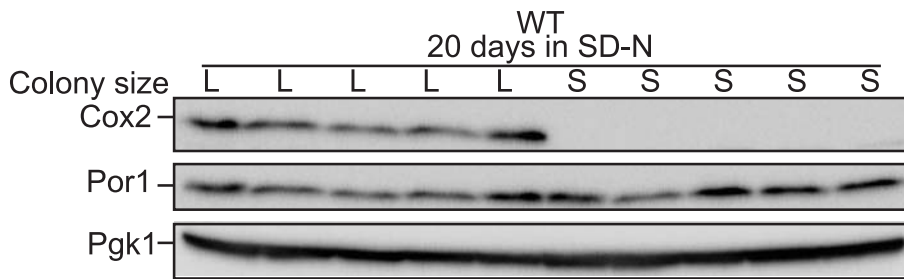

C

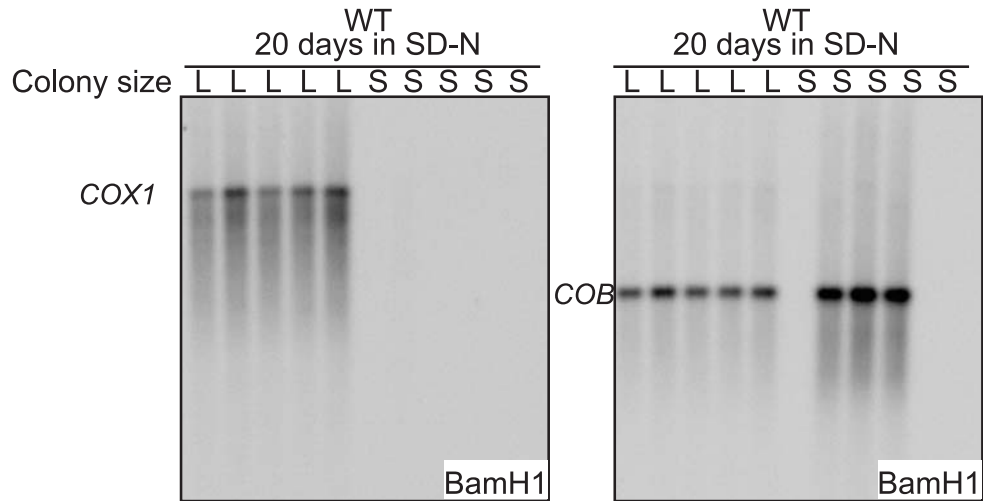

A

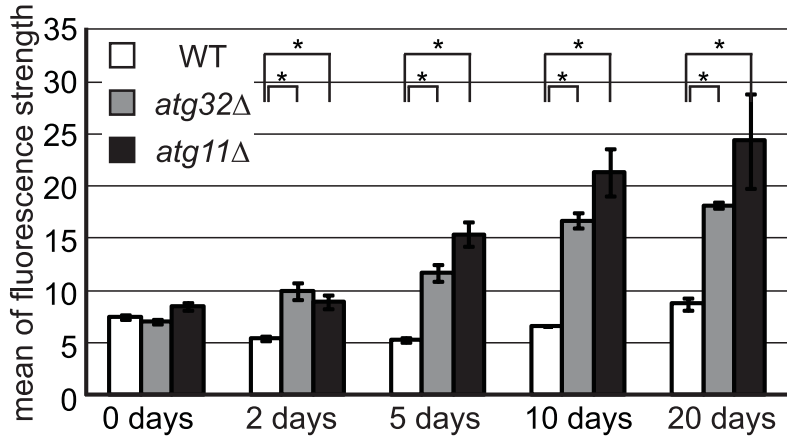

B

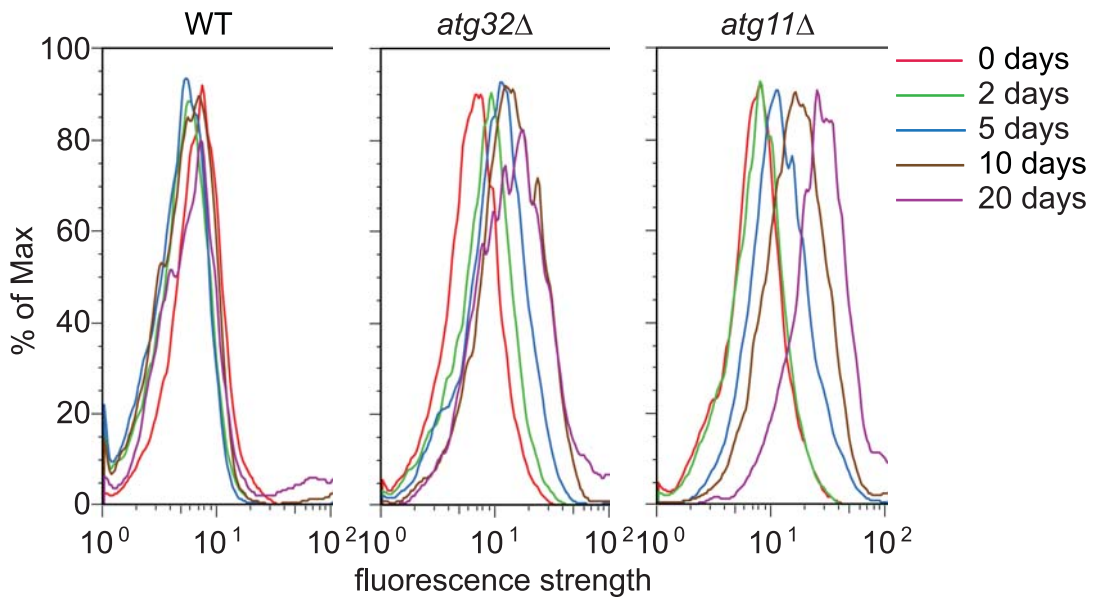

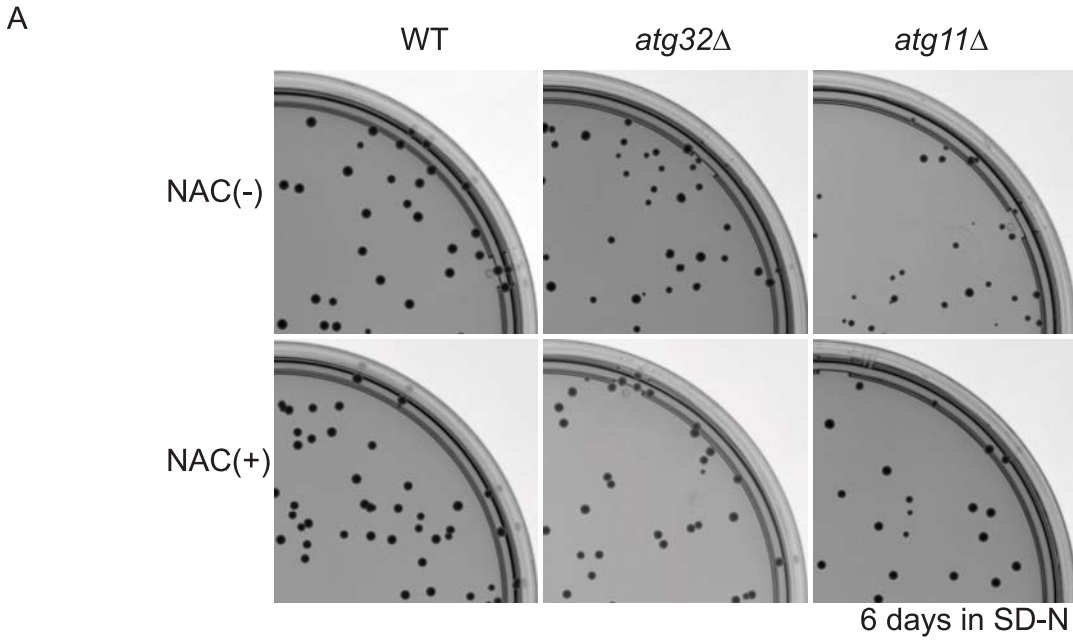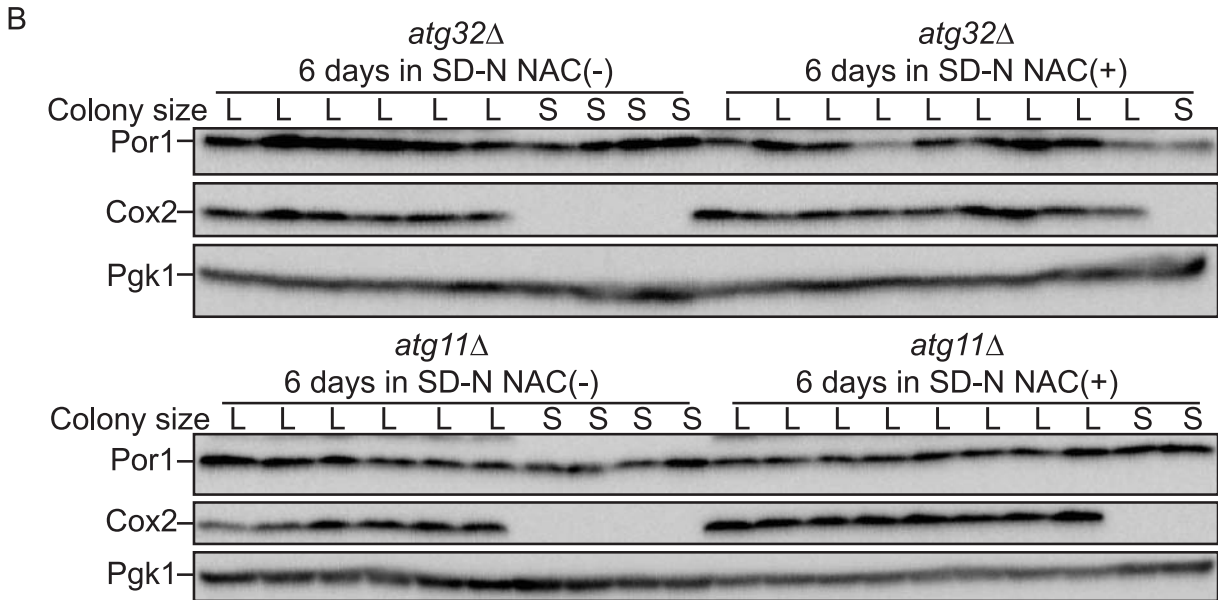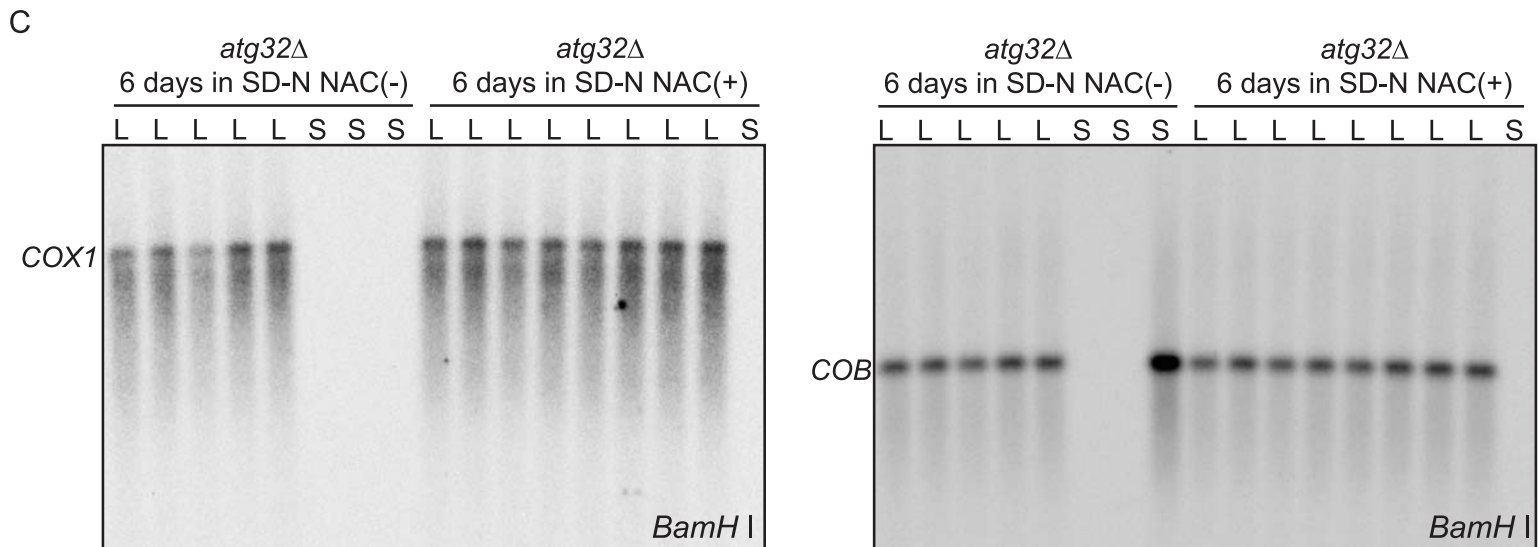

Supplement: supp_M111.280156_jbc.M111.280156-1.pdf [file supp_M111.280156_jbc.M111.280156-1.pdf]
